# Supplementary material for: Iron oxide encapsulated titanium niobate nanotubes as a high-performance lithium-free anode for solid-state batteries
Source: Royal Society of Chemistry journal article supplement (doi:10.1039/d0ta11030b), 2021-01-01
Supplement: d0ta11030b1.pdf [file d0ta11030b1.pdf]

## Supporting information

### **Iron Oxide Encapsulated Titanium Niobate Nanotubes as High-Performance Lithium-Free Anode for Solid-State Batteries**

*Wei Wu,<sup>#1,2</sup> Wang Lin,<sup>#1</sup> Hongjiang Chen,<sup>1</sup> Keyan Wei,<sup>1</sup> Zhitong Li,<sup>1</sup> Haitao Yang,<sup>1</sup>  
Mingxian Liu,<sup>1</sup> Huaicheng Xiang<sup>1</sup>, Libo Deng<sup>2</sup> and Lei Yao<sup>\*1</sup>*

<sup>1</sup> Shenzhen Key Laboratory of Special Functional Materials, Shenzhen Engineering Laboratory for Advanced Technology of Ceramics, Guangdong Research Center for Interfacial Engineering of Functional Materials, College of Materials Science and Engineering, Shenzhen University, Shenzhen 518060, P. R. China

<sup>2</sup> College of Chemistry and Environmental Engineering, Shenzhen University, Shenzhen 518060, China

<sup>#</sup> These authors (W. Wu and W. Lin) contributed equally to this work.

<sup>\*</sup> Corresponding author:

E-mail address: [lyao@szu.edu.cn](mailto:lyao@szu.edu.cn) (L. Yao)

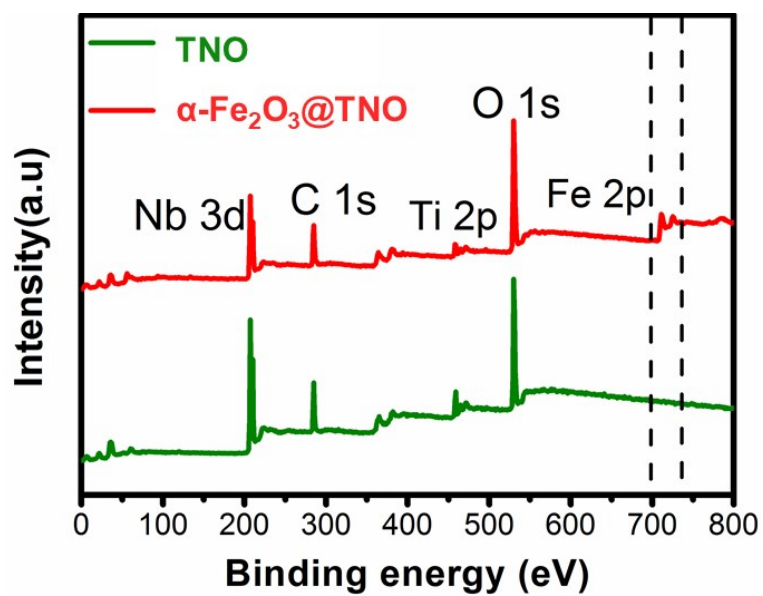

**Figure S1.** Wide-scan XPS survey of  $\alpha\text{-Fe}_2\text{O}_3\text{@TNO}$  nanofibers and TNO nanofibers.

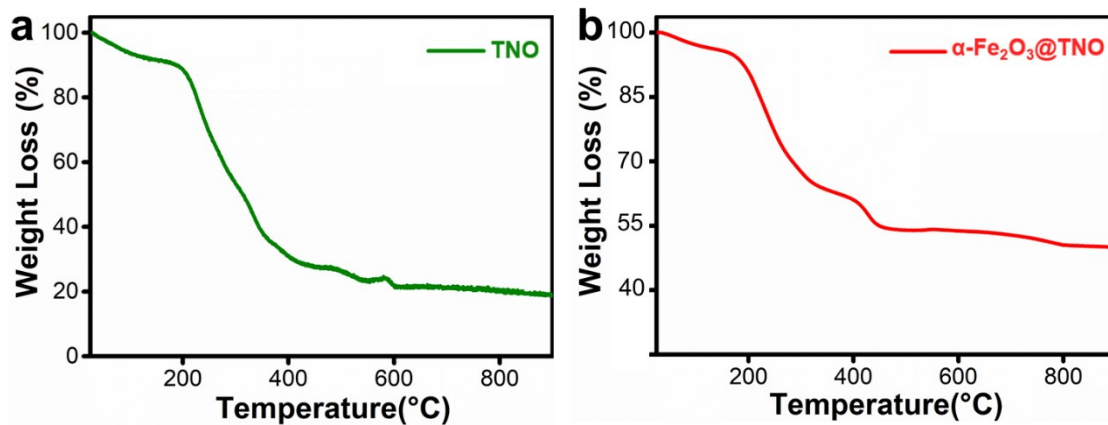

**Figure S2.** TGA curves of (a) TNO and (b)  $\alpha\text{-Fe}_2\text{O}_3\text{@TNO}$  nanofibers.

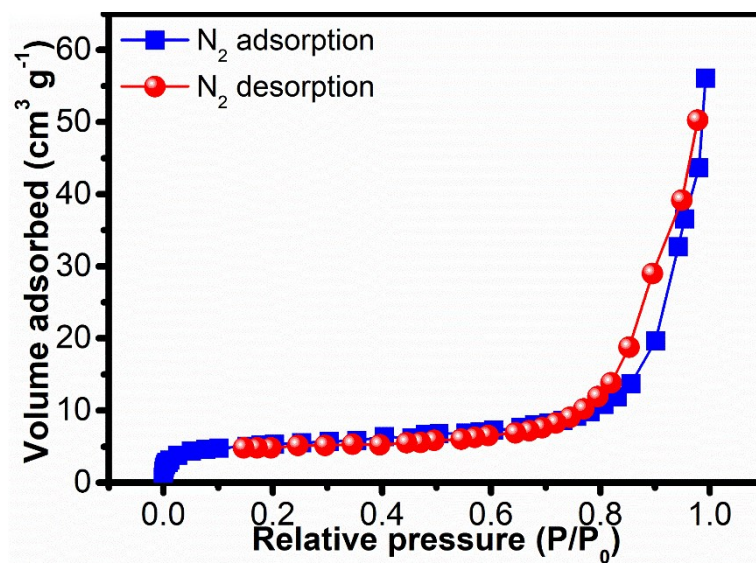

**Figure S3.** Nitrogen sorption isotherm of the  $\alpha\text{-Fe}_2\text{O}_3\text{@TNO}$  nanofibers.

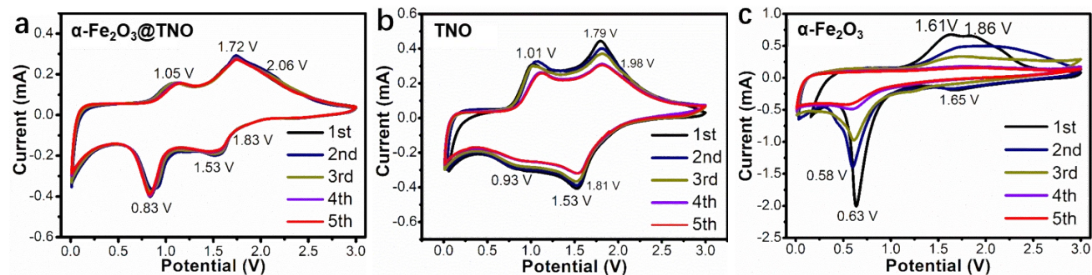

**Figure S4.** CV curves of (a)  $\alpha$ -Fe<sub>2</sub>O<sub>3</sub>@TNO, (b) TNO, and (c)  $\alpha$ -Fe<sub>2</sub>O<sub>3</sub> electrodes at a scan rate of 0.1 mV s<sup>-1</sup> measured in the voltage range of 0.01-3.0 V for the initial 5 cycles.

In the cathodic and anodic sweeps of  $\alpha$ -Fe<sub>2</sub>O<sub>3</sub>@TNO (Fig. S2a), the peak couples at 1.53/1.72 V, 1.83/2.06 V, and 0.83/1.05 V can be attributed to the valence variations of Nb<sup>5+</sup>/Nb<sup>4+</sup>, Ti<sup>4+</sup>/Ti<sup>3+</sup>, and Nb<sup>4+</sup>/Nb<sup>3+</sup> redox couples due to the insertion and extraction of Li<sup>+</sup> in TNO (Fig. S2b).<sup>1</sup> Moreover, the sharp peak at 0.83 V also corresponds to the Fe<sup>0</sup>/Fe<sup>3+</sup> (Fe<sup>2+</sup>) redox couples, originating from the phase transition from  $\alpha$ -Fe<sub>2</sub>O<sub>3</sub> to Li<sub>x</sub>Fe<sub>2</sub>O<sub>3</sub>, subsequently to cubic Li<sub>2</sub>Fe<sub>2</sub>O<sub>3</sub>, and finally to the complete reduction to Fe<sup>0</sup> and then in reverse.<sup>2</sup> The plateau voltage for the  $\alpha$ -Fe<sub>2</sub>O<sub>3</sub>@TNO nanofibers is higher than that for the  $\alpha$ -Fe<sub>2</sub>O<sub>3</sub> nanoparticles in Fig. S2c, where a clear decrease from 0.63 to 0.58 V is observed after only 5 cycles, indicating the greatly improved conductivity and kinetics of  $\alpha$ -Fe<sub>2</sub>O<sub>3</sub> in the composite nanofibers.<sup>3</sup> Moreover, the intensity and peak positions for the  $\alpha$ -Fe<sub>2</sub>O<sub>3</sub>@TNO nanofibers only showed slight changes within the initial 5 cycles, signifying the good stability and reversibility of the electrochemical reactions in the composite.

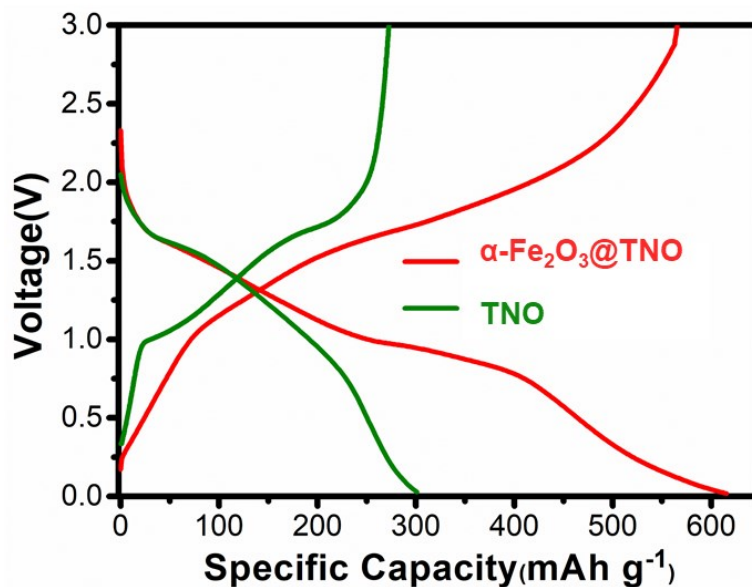

**Figure S5.** Discharge/charge curves of  $\alpha\text{-Fe}_2\text{O}_3\text{@TNO}$  and TNO for the first cycle at  $0.1 \text{ A g}^{-1}$  from 0.01-3.0 V.

The discharge curve of  $\alpha\text{-Fe}_2\text{O}_3\text{@TNO}$  can be divided into four plateau regions: (1) between 2.0 and 1.7 V, (2) at  $\approx 1.6$  V, (3) between 1.2 and 0.7 V, and (4) a further sloping region down to 0.01 V, representing different stages upon  $\text{Li}^+$  insertion. Typically, the plateau between 1.2 and 0.7 V corresponds to the lithiation of  $\alpha\text{-Fe}_2\text{O}_3$ . In contrast, the TNO electrode displays only three discharge plateau regions with a generally constant decline below  $\approx 1.5$  V in the absence of  $\alpha\text{-Fe}_2\text{O}_3$ . These results are consistent with the CV analysis in Fig. S2.

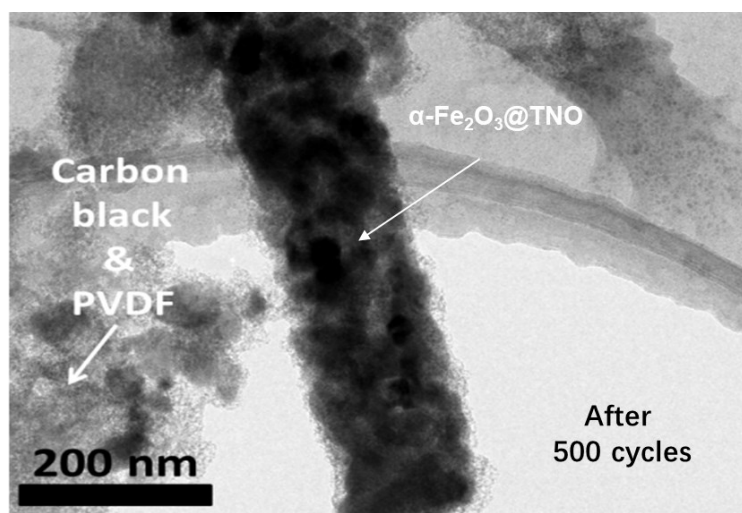

**Figure S6.** TEM image of  $\alpha\text{-Fe}_2\text{O}_3\text{@TNO}$  nanofiber after 500 cycles.

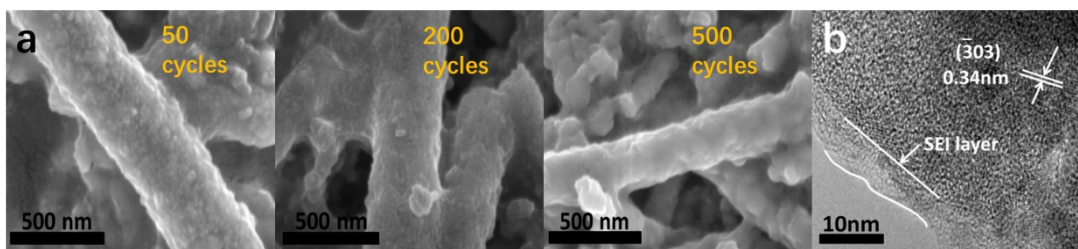

**Figure S7.** SEM images of (a)  $\alpha\text{-Fe}_2\text{O}_3\text{@TNO}$  electrode after 50, 200, and 500 cycles and (b) HRTEM image of  $\alpha\text{-Fe}_2\text{O}_3\text{@TNO}$  nanofiber after 500 cycles.



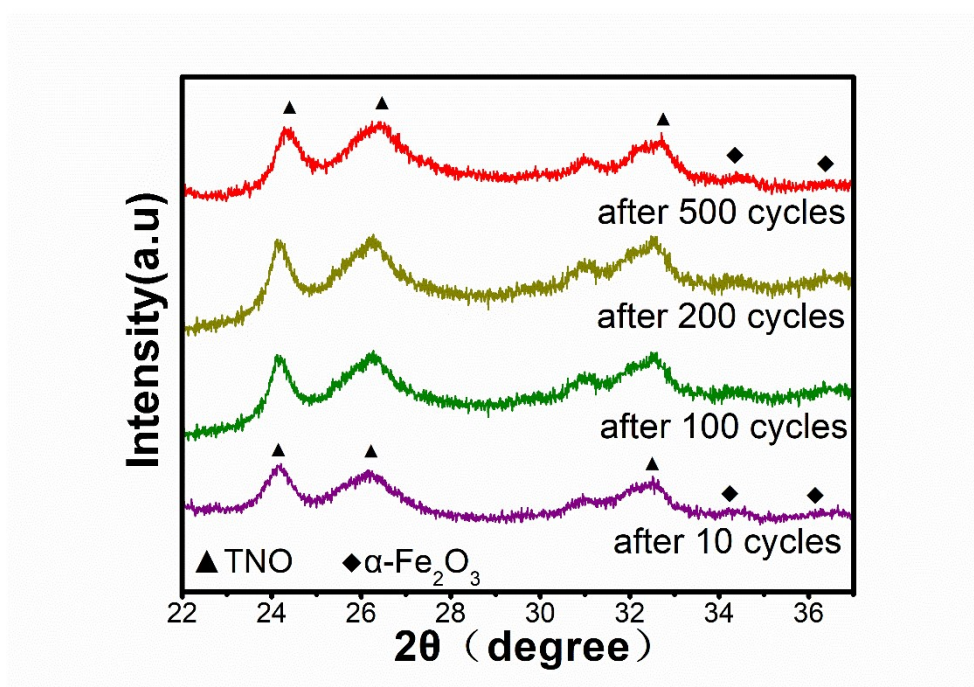

**Figure S8.** XRD patterns of  $\alpha\text{-Fe}_2\text{O}_3@\text{TNO}$  electrode after 20, 100, 200, and 500 cycles.

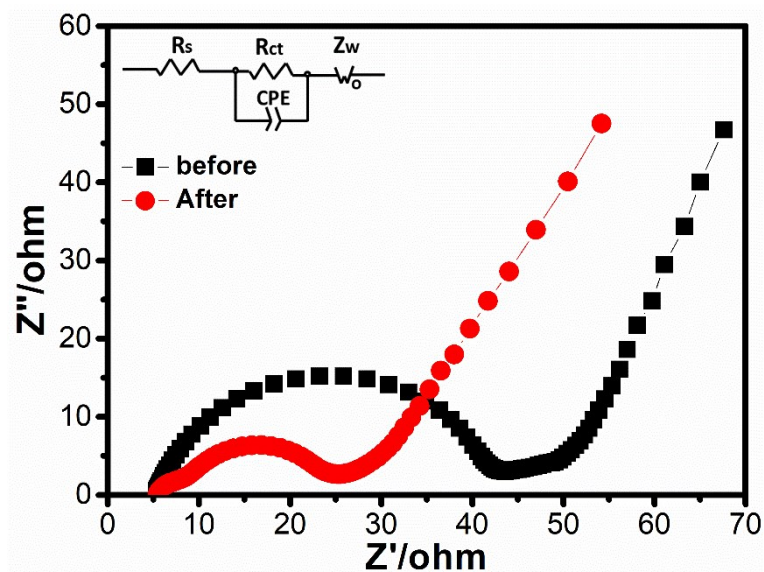

**Figure S9.** Fitted Nyquist plots of  $\alpha\text{-Fe}_2\text{O}_3@\text{TNO}$  electrode before and after rate capability test.

Each plot consists of semicircles in the high-medium-frequency region ( $R_s$  and the  $R_{ct}/\text{CPE}$  pair) and one slope in the low-frequency region ( $Z_w$ ), representing the interfacial resistance/charge-transfer resistance and  $\text{Li}^+$  diffusion in the bulk particle, respectively.<sup>4</sup> The fitted resistance values for  $\alpha\text{-Fe}_2\text{O}_3@\text{TNO}$  electrode before and after the rate capability test were 25.8 and 44.5  $\Omega$ . This indicates a faster electrochemical kinetics after the activation of the  $\alpha\text{-Fe}_2\text{O}_3@\text{TNO}$  electrode through the rate capability test.<sup>5</sup>

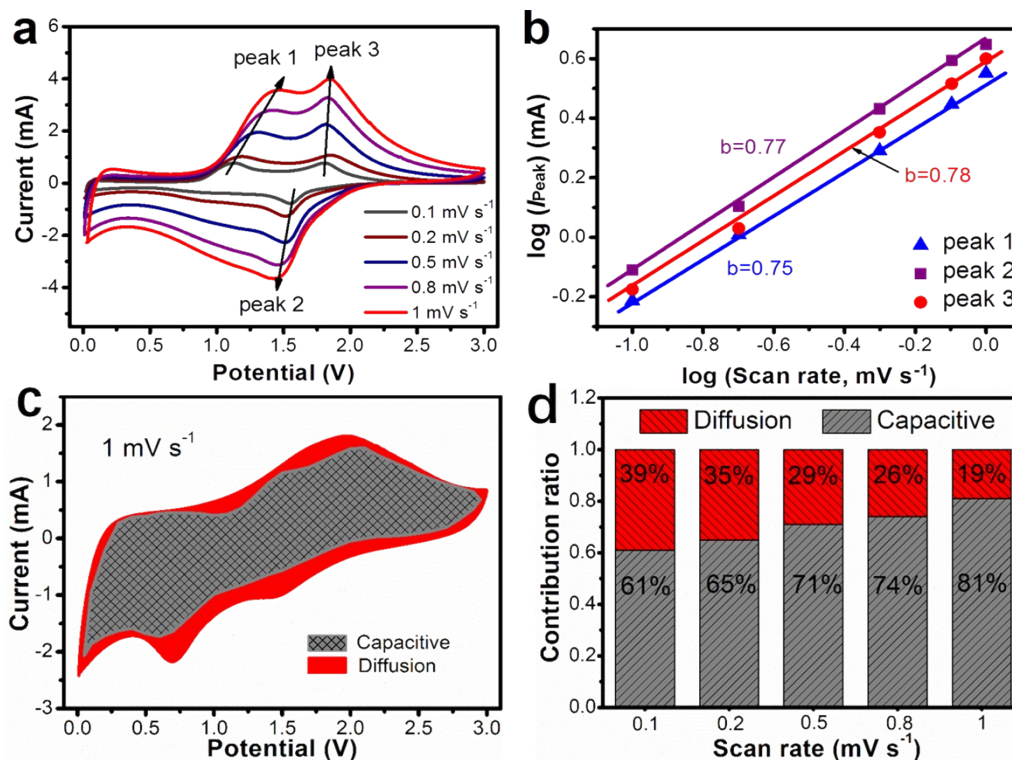

**Figure S10.** (a) CV curves of TNO electrode at scan rates from 0.1 to 1.0  $\text{mV s}^{-1}$  and (b) logarithmic relationship between the peak current and scan rate, (c) CV curves with the separation between total current (red region) and capacitive current (shaded region) at a scan rate of 1.0  $\text{mV s}^{-1}$ , and (d) normalized contribution ratio of capacitive capacity at different scan rates.

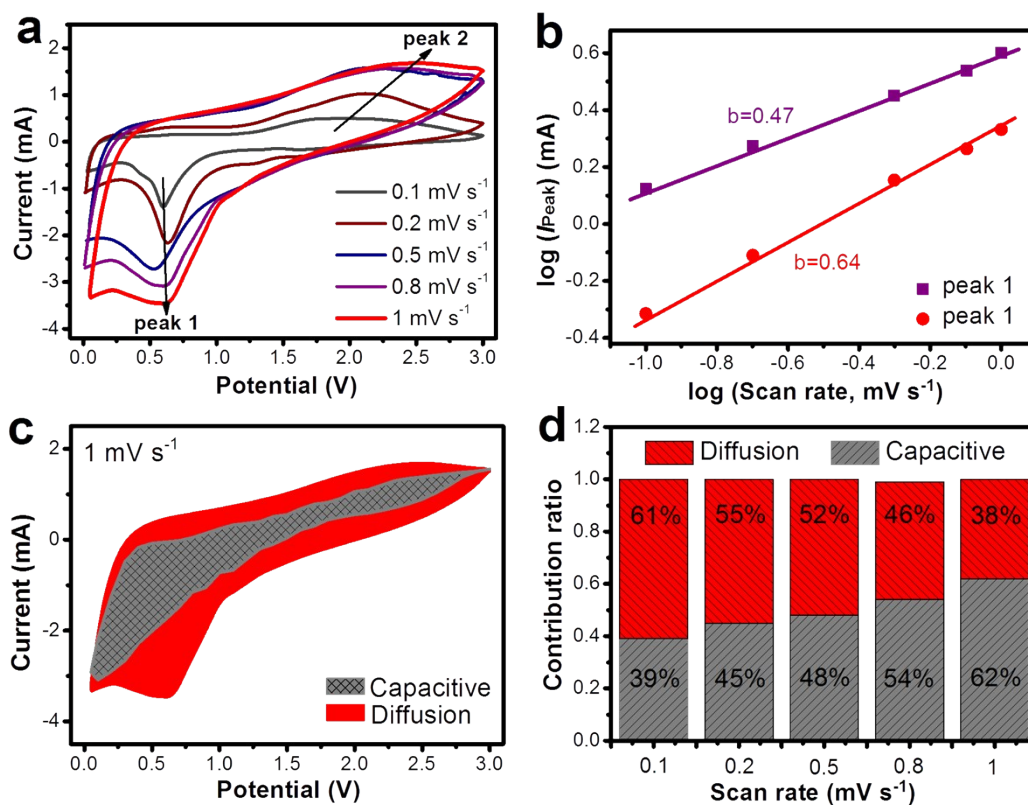

**Figure S11.** (a) CV curves of  $\alpha\text{-Fe}_2\text{O}_3$  electrode at scan rates from 0.1 to 1.0  $\text{mV s}^{-1}$  and (b) logarithmic relationship between the peak current and scan rate, (c) CV curves with the separation between total current (red region) and capacitive current (shaded region) at a scan rate of 1.0  $\text{mV s}^{-1}$ , and (d) normalized contribution ratio of capacitive capacity at different scan rates.

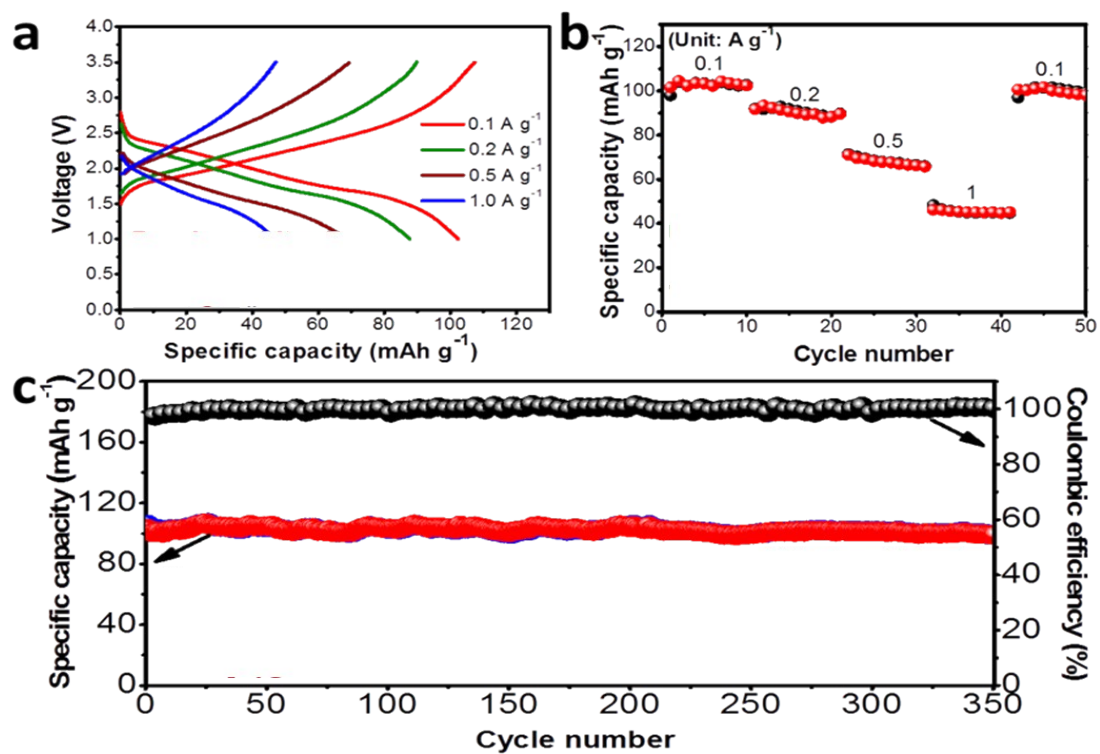

**Figure S12.** (a) Discharge/charge curves and (b) rate performance of  $\text{Fe}_2\text{O}_3@\text{TNO}/\text{SSE}/\text{LFP}$  SSB pouch full cell at current densities between  $0.1$  and  $1.0 \text{ A g}^{-1}$  and (c) its long-term cycling performance at  $0.1 \text{ A g}^{-1}$ .

**Table S1.** Electrochemical properties of representative TNO-based anodes reported recently in comparison with this work.

| Materials                                               | Specific current (mA g <sup>-1</sup> ) | Cycle number | Retained specific capacity (mAh g <sup>-1</sup> ) | Capacity retention | Fading rate (per cycle) | Ref.      |
|---------------------------------------------------------|----------------------------------------|--------------|---------------------------------------------------|--------------------|-------------------------|-----------|
| Porous TNO                                              | 388                                    | 1000         | ~190                                              | 84.0%              | 0.016%                  | 6         |
| Porous TNO nanotubes                                    | 388                                    | 700          | ~220                                              | 88.0%              | 0.017%                  | 7         |
| TNO/Graphene fibers                                     | 500                                    | 100          | 195                                               | ~76.0%             | 0.240%                  | 1         |
| TNO/Graphene                                            | 388                                    | 300          | 200                                               | 72.7%              | 0.091%                  | 8         |
| Hollow TNO@C spheres                                    | 97                                     | 500          | 225                                               | 75.0%              | 0.050%                  | 9         |
| TNO hollow nanofiber                                    | 155                                    | 150          | 210                                               | 70.0%              | 0.200%                  | 10        |
| Nb <sub>2</sub> O <sub>5</sub> /TNO spheres             | 388                                    | 100          | 247                                               | 89.8%              | 0.102%                  | 11        |
| Mo-doped TNO                                            | 194                                    | 10           | ~300                                              | N/A                | N/A                     | 12        |
| Hierarchical MoS <sub>2</sub> /TNO hetero-nanostructure | 1000                                   | 200          | 740                                               | 91.6%              | 0.042%                  | 13        |
| $\alpha$ -Fe <sub>2</sub> O <sub>3</sub> @TNO           | 500<br>100                             | 500<br>80    | 423<br>611                                        | 79.2%<br>97.6%     | 0.042%<br>0.028%        | This work |

---

## References

1. X. Wang and G. Shen, *Nano Energy*, 2015, **15**, 104-115.
2. C. Li, A. Sarapulova, Z. Zhao, Q. Fu, Vanessa Trouillet, A. Missiul, E. Welter and S. Dsoke, *Chem. Mater.*, 2019, **31**, 5633-5645.
3. K. Cao, L. Jiao, H. Liu, Y. Liu, Y. Wang, Z. Guo and H. Yuan, *Adv. Energy Mater.*, 2015, **5**, 1401421.
4. Q. Fu, R. Li, X. Zhu, G. Liang, L. Luo, Y. Chen, C. Lin and X. S. Zhao, *J. Mater. Chem. A*, 2019, **7**, 19862-19871.
5. Q. Fu, X. Zhu, R. Li, G. Liang, L. Luo, Y. Chen, Y. Ding, C. Lin, K. Wang and X. S. Zhao, *Energy Storage Mater.*, 2020, **30**, 401-411.
6. H. Park, D. H. Shin, T. Song, W. I. Park and U. Paik, *J. Mater. Chem. A*, 2017, **5**, 6958-6965.
7. A. G. Ashish, P. Arunkumar, B. Babu, P. Manikandan, S. Sarang and M. M. Shaijumon, *Electrochim. Acta*, 2015, **176**, 285-292.
8. G. Zhu, Q. Li and R. Che, *Chem.* 2018, **24**, 12932-12937.
9. H. Yu, H. Lan, L. Yan, S. Qian, X. Cheng, H. Zhu, N. Long, M. Shui and J. Shu, *Nano Energy*, 2017, **38**, 109-117.
10. S. Yoon, S. Y. Lee, T. L. Nguyen, I. T. Kim, S.-G. Woo and K. Y. Cho, *J. Alloys Compd.*, 2018, **731**, 437-443.
11. H. Song and Y. T. Kim, *Chem. Commun.*, 2015, **51**, 9849-9852.
12. C. Pham, J. H. Choi, J. Yun, A. S. Bandarenka, J. Kim, P. V. Braun, S. Y. Jeong and C. R. Cho, *ACS Nano*, 2017, **11**, 1026-1033.
